# Supplementary material for: A Single Amino Acid Substitution in RFC4 Leads to Endoduplication and Compromised Resistance to DNA Damage in Arabidopsis thaliana
Source: MDPI journal article supplement (doi:10.3390/genes13061037), 2022-06-09
Supplement: s1 [file s1]

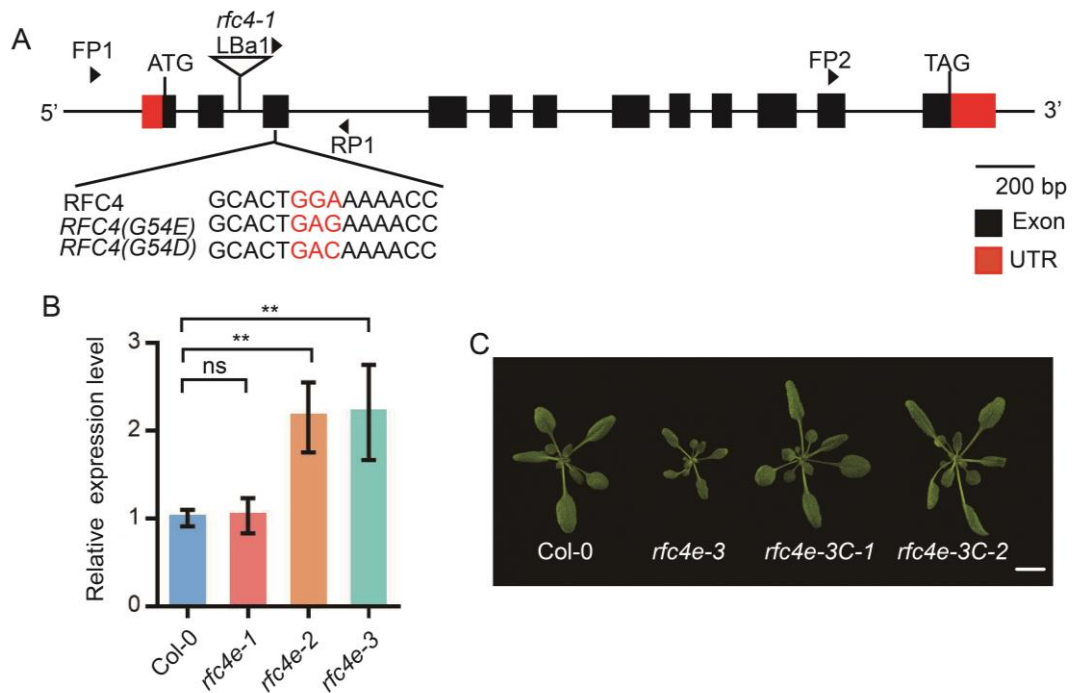

**Figure S1.** Mutation analysis and complementation assays of *rhc4e-3*. (A) Schematic diagrams of the *AtRFC4* gene and T-DNA insertion position. The black boxes and lines indicate exons and introns, respectively; red boxes represent UTRs and red letters represent mutated bases. (B) The relative expression of *RFC4* or *RFC4*<sup>G54E</sup> of Col-0 or *rhc4e-1*, *rhc4e-2* and *rhc4e-3* seedlings at 12 days. Error bars indicate  $\pm$  SD (\*\* $P < 0.01$ ). (C) Phenotype of wild-type and complementation seedling *rhc4e-3C-1* and *rhc4e-3C-2* at 18 days after germination. Bar = 1 cm.

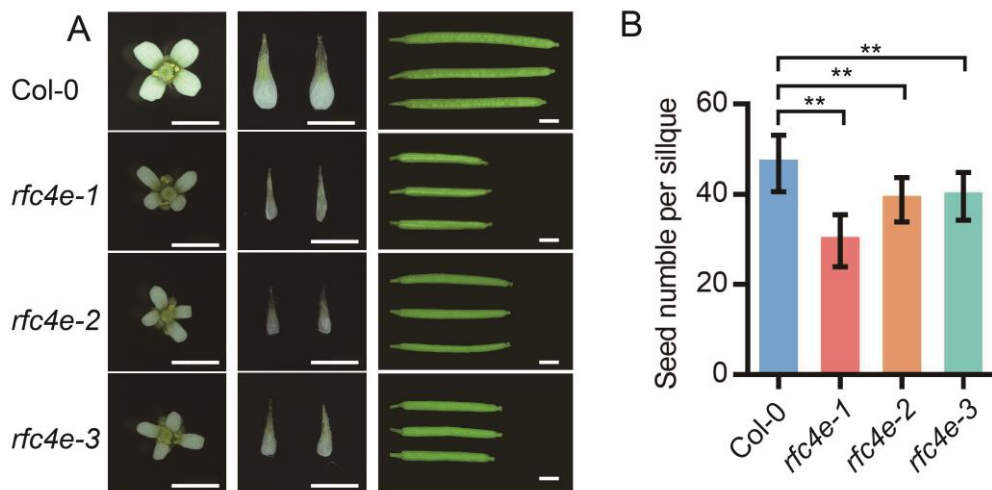

**Figure S2.** Morphology of representative flowers, petals and siliques for the *rhc4e* mutants. (A) Morphology of representative flowers, petals and siliques of Col-0, *rhc4e-1*, *rhc4e-2* and *rhc4e-3*. Bar = 2 mm. (B) The average number of seeds per silique in Col-0, *rhc4e-1*, *rhc4e-2* and *rhc4e-3*. Error bars indicate  $\pm$  SD (\*\* $P < 0.01$ ).

**Table S1** All DEGs ( $p < 0.05$ ) analyzed by Gene Ontology (GO) term enrichment based on the biological process category in *rfc4e-3*. The GO enrichment analysis was based on biological process functional categories of ShinyGo v0.61 software, and the top 20 pathways were showed as follows.

| Enrichment<br>FDR | nGenes | Pathway<br>Genes | Fold<br>Enrichment | Pathways                                    |
|-------------------|--------|------------------|--------------------|---------------------------------------------|
| 9.2E-12           | 243    | 1692             | 1.6                | Response to oxygen-containing compound      |
| 6.9E-10           | 187    | 1265             | 1.7                | Cellular response to stress                 |
| 3.1E-08           | 48     | 195              | 2.8                | DNA replication                             |
| 1.2E-07           | 121    | 770              | 1.8                | Response to radiation                       |
| 5.6E-07           | 38     | 148              | 2.9                | DNA-dependent DNA replication               |
| 1.7E-06           | 220    | 1716             | 1.5                | Cellular response to chemical stimulus      |
| 1.8E-06           | 73     | 411              | 2                  | Response to water                           |
| 3.2E-06           | 33     | 127              | 3                  | Response to karrikin                        |
| 3.4E-06           | 54     | 273              | 2.3                | Response to extracellular stimulus          |
| 3.6E-06           | 44     | 202              | 2.5                | Response to starvation                      |
| 3.8E-06           | 136    | 962              | 1.6                | Response to inorganic substance             |
| 3.9E-06           | 237    | 1914             | 1.4                | Response to external stimulus               |
| 3.9E-06           | 46     | 219              | 2.4                | Cellular response to extracellular stimulus |
| 3.9E-06           | 34     | 137              | 2.8                | Double-strand break repair                  |
| 4.0E-06           | 75     | 442              | 1.9                | Response to acid chemical                   |
| 4.1E-06           | 66     | 371              | 2                  | Secondary metabolic proc.                   |
| 6.7E-06           | 110    | 746              | 1.7                | Response to light stimulus                  |
| 8.8E-06           | 134    | 966              | 1.6                | Response to lipid                           |
| 1.5E-05           | 68     | 402              | 1.9                | Response to water deprivation               |
| 1.6E-05           | 46     | 232              | 2.3                | Response to nutrient levels                 |

**Table S2** Down-regulated genes ( $P < 0.05$ , foldchange  $\leq 0.67$ ) analyzed by Gene Ontology (GO) term enrichment based on the biological process category in *rfc4e-3*. The GO enrichment analysis was based on biological process functional categories of ShinyGo v0.61 software, and the top 10 pathways were showed as follows.

| Enrichment<br>FDR | nGenes | Pathway<br>Genes | Fold<br>Enrichment | Pathway                                     |
|-------------------|--------|------------------|--------------------|---------------------------------------------|
| 9.77E-10          | 22     | 80               | 6.826325           | Cellular response to phosphate starvation   |
| 4.72E-08          | 26     | 148              | 4.360797           | Inorganic anion transport                   |
| 2.78E-08          | 28     | 164              | 4.238073           | Cellular response to starvation             |
| 1.69E-08          | 30     | 179              | 4.160279           | Cellular response to nutrient levels        |
| 3.58E-08          | 31     | 202              | 3.80947            | Response to starvation                      |
| 2.74E-08          | 33     | 219              | 3.740452           | Cellular response to extracellular stimulus |
| 1.37E-08          | 71     | 746              | 2.362511           | Response to light stimulus                  |
| 2.78E-08          | 71     | 770              | 2.288874           | Response to radiation                       |
| 9.31E-09          | 128    | 1716             | 1.851599           | Cellular response to chemical stimulus      |

**Table S3.** Up-regulated genes ( $P < 0.05$ , foldChange  $\geq 1.5$ ) analyzed by KEGG term enrichment based on the biological process category in *rfc4e-3*. The KEGG enrichment was analyzed by ShinyGo v0.61 software.

| Enrichment FDR | nGenes | Pathway Genes | Fold Enrichment | Pathway                    |
|----------------|--------|---------------|-----------------|----------------------------|
| 3.88E-08       | 18     | 63            | 6.048823        | Homologous recombination   |
| 1.05E-05       | 13     | 48            | 5.73378         | DNA replication            |
| 0.000179       | 10     | 37            | 5.72186         | Mismatch repair            |
| 0.002875       | 9      | 42            | 4.536617        | Base excision repair       |
| 0.005244       | 11     | 67            | 3.475816        | Nucleotide excision repair |

**Table S4.** Primers used in this study.

| Name             | Sequence (5'-3')                              | Description                                                    |
|------------------|-----------------------------------------------|----------------------------------------------------------------|
| <i>FP1</i>       | aacaagtaccctacactaaaaggccg                    | Amplify upstream sequences for <i>RFC4(G54E)</i> mutagenesis   |
| <i>At4eMR1</i>   | gcagtagtggttttctcagtcctgggtgg                 |                                                                |
| <i>At4eMF2</i>   | ccaccaggcactgagaaaaaccactactgc                | Amplify downstream sequences for <i>RFC4(G54E)</i> mutagenesis |
| <i>At4R2</i>     | gcaatgtccatcaagctatctggtc                     |                                                                |
| <i>At4F</i>      | gaccatgattacgaattcgagctctacagtttgtatccagc     | Amplified full-length sequence of <i>AtRFC4</i>                |
| <i>AT4R</i>      | caggctcgactctagaggatccctacactatgatagtctcataag |                                                                |
| <i>RP1</i>       | ctgtctagctacctaattggg                         | <i>rfc4-1</i> T-DNA insert identification                      |
| <i>LBa1</i>      | tggttcacgtagtgggccatcg                        |                                                                |
| <i>FP1</i>       | aacaagtaccctacactaaaaggccg                    | <i>AtRFC4</i> in situ identification                           |
| <i>RP1</i>       | ctgtctagctacctaattggg                         |                                                                |
| <i>FLAG-R</i>    | aacgatcggggaaattcgag                          | Site-directed mutagenesis plasmid transfer validation          |
| <i>FP2</i>       | agtgacataacagacatgc                           |                                                                |
| <i>GFP-R</i>     | ttcacctctccactgacag                           | Complementary plasmid transfer verification                    |
| <i>FP2</i>       | agtgacataacagacatgc                           |                                                                |
| <i>AtBRCA1-F</i> | ccatgtattttgcaatgcgtg                         | At4g21070, for RT-qPCR                                         |
| <i>AtBRCA1-R</i> | tgtggagcacctcgaatctct                         |                                                                |
| <i>AtRAD51-F</i> | cgaggaaggatctcttcgag                          | At5g20850, for RT-qPCR                                         |
| <i>AtRAD51-R</i> | gcactagtgaacccagagg                           |                                                                |
| <i>AtRAD54-F</i> | cagcaggtgacgaggtgac                           | At3g19210, for RT-qPCR                                         |
| <i>AtRAD54-R</i> | cgcttatttacaggttggtcc                         |                                                                |
| <i>AtPARP1-F</i> | acccatcagaggctcaaaca                          | At2g31320, for RT-qPCR                                         |
| <i>AtPARP1-R</i> | acgcatcttgattgttcaca                          |                                                                |
| <i>AtPARP2-F</i> | tatgccaaactggcgctaa                           | At4g02390, for RT-qPCR                                         |
| <i>AtPARP2-R</i> | tcattgtctccaaagcaacctc                        |                                                                |
| <i>AtRPA1E-F</i> | tggagaagtgcgactgaagc                          | At4g19130, for RT-qPCR                                         |
| <i>AtRPA1E-R</i> | acctccagttgcggaacaat                          |                                                                |
| <i>AtPCNA1-F</i> | attggaaccgctaaca                              | At1g07370, for RT-qPCR                                         |
| <i>AtPCNA1-R</i> | caactccgacgataag                              |                                                                |
| <i>AtKU80-F</i>  | tcgtaaaggctgcgtcttgg                          | At1g48050, for RT-qPCR                                         |

| Name               | Sequence (5'-3')           | Description            |
|--------------------|----------------------------|------------------------|
| <i>AtKU80-R</i>    | ttggcataacttgaatagatggttca |                        |
| <i>AtKU70-F</i>    | cgagcttcgtgaaaccagagatg    | At1g16970, for RT-qPCR |
| <i>AtKU70-R</i>    | ctttctcatcagggtcatcgcc     |                        |
| <i>AtPol λ-F</i>   | acgacgtgttgaacagaaggc      | At1g10520, for RT-qPCR |
| <i>AtPol λ-R</i>   | agctgggaatagtcagtgctg      |                        |
| <i>AtLIG4-F</i>    | ttggcttcaagtgagaacagagc    | At5g57160, for RT-qPCR |
| <i>AtLIG4-R</i>    | tgaccacttcatctcctgagc      |                        |
| <i>AtNAC053-F</i>  | caacagagtttgagccag         | At3g10500, for RT-qPCR |
| <i>AtNAC053-R</i>  | ttgccgtatgaccagccca        |                        |
| <i>AtNAC103-F</i>  | gtcactgggaagataagaa        | At5g64060, for RT-qPCR |
| <i>AtNAC103-R</i>  | gagaacgcaaagcacataa        |                        |
| <i>AtGR1-F</i>     | gaaggagcagacaaagtgag       | At3g24170, for RT-qPCR |
| <i>AtGR1-R</i>     | ggtgagatggaagtgatagg       |                        |
| <i>AtRAD17-F</i>   | ctctggcaagtggagcaatc       | At5g66130, for RT-qPCR |
| <i>AtRAD17-R</i>   | tcctcatctgtctcttcgcc       |                        |
| <i>AtCYCB1;1-F</i> | gatcaatcatcgtctctgtacacg   | At4g37490, for RT-qPCR |
| <i>AtCYCB1;1-R</i> | caegtctactaccttgggttccc    |                        |
| <i>AtSMR4-F</i>    | gccgagaagcacgatgtatag      | At5g02220, for RT-qPCR |
| <i>AtSMR4-R</i>    | agatctgggtggctgaaagtacc    |                        |
| <i>AtSMR5-F</i>    | aaactacgacgacggagatagc     | At1g07500, for RT-qPCR |
| <i>AtSMR5-R</i>    | gctaccaccgagaagaacaagt     |                        |
| <i>AtSMR7-F</i>    | gccaaaacatcgattcgggcttc    | At3g27630, for RT-qPCR |
| <i>AtSMR7-R</i>    | tcgccgtgggagtgatacaaat     |                        |
| <i>AtWEE1-F</i>    | tattactcctcgtgggt          | At1g02970, for RT-qPCR |
| <i>AtWEE1-R</i>    | atgcctttgctatctg           |                        |
| <i>AtFT-F</i>      | gaacaacctttggcaatgagatt    | At1g65480, for RT-qPCR |
| <i>AtFT-R</i>      | caccctgggtgcatacactgtt     |                        |
| <i>AtFLC-F</i>     | atccgtcgtcttctcgtc         | At5g10140, for RT-qPCR |
| <i>AtFLC-R</i>     | cggctcttctggctctagtca      |                        |
| <i>AtAP1-F</i>     | ccatacaggagcaaacagc        | At1g69120, for RT-qPCR |
| <i>AtAP1-R</i>     | tcttcttgatacagaccacc       |                        |
| <i>AtACTIN1-F</i>  | cgatgaagctcaatccaaacga     | At2g37620, for RT-qPCR |
| <i>AtACTIN1-R</i>  | cagagtcgagcacaataaccg      |                        |
